# Supplementary material for: The brain reacting to COVID-19: analysis of the cerebrospinal fluid proteome, RNA and inflammation
Source: Springer Nature journal article supplement (doi:10.1186/s12974-023-02711-2), 2023-02-09
Supplement: 12974_2023_2711_MOESM1_ESM.pdf [file 12974_2023_2711_MOESM1_ESM.pdf]

**Supplementary material****Supplementary Table 1: Protein Abbreviation List for Figure 1**

| Protein.Names | First.Protein.Description                                  |
|---------------|------------------------------------------------------------|
| VGF_HUMAN     | Neurosecretory protein VGF                                 |
| TYRO3_HUMAN   | Tyrosine-protein kinase receptor TYRO3                     |
| TIMP2_HUMAN   | Metalloproteinase inhibitor 2                              |
| TIMP1_HUMAN   | Metalloproteinase inhibitor 1                              |
| TICN1_HUMAN   | Testican-1                                                 |
| SPRL1_HUMAN   | SPARC-like protein 1                                       |
| SPRC_HUMAN    | SPARC                                                      |
| SLIK1_HUMAN   | SLIT and NTRK-like protein 1                               |
| SHPS1_HUMAN   | Tyrosine-protein phosphatase non-receptor type substrate 1 |
| SGCE_HUMAN    | Epsilon-sarcoglycan                                        |
| SE6L2_HUMAN   | Seizure 6-like protein 2                                   |
| IC1_HUMAN     | Plasma protease C1 inhibitor                               |
| A2AP_HUMAN    | Alpha-2-antiplasmin                                        |
| AACT_HUMAN    | Alpha-1-antichymotrypsin                                   |
| A1AT_HUMAN    | Alpha-1-antitrypsin                                        |
| SEM7A_HUMAN   | Semaphorin-7A                                              |
| LYAM1_HUMAN   | L-selectin                                                 |
| 7B2_HUMAN     | Neuroendocrine protein 7B2                                 |
| SCG2_HUMAN    | Secretogranin-2                                            |
| RNAS4_HUMAN   | Ribonuclease 4                                             |
| RNAS1_HUMAN   | Ribonuclease pancreatic                                    |
| RGMB_HUMAN    | RGM domain family member B                                 |
| RET4_HUMAN    | Retinol-binding protein 4                                  |
| EPCR_HUMAN    | Endothelial protein C receptor                             |
| PRIO_HUMAN    | Major prion protein                                        |
| KPYM_HUMAN    | Pyruvate kinase PKM                                        |
| PGRP2_HUMAN   | N-acetylmuramoyl-L-alanine amidase                         |
| PEBP4_HUMAN   | Phosphatidylethanolamine-binding protein 4                 |
| PCSK1_HUMAN   | ProSAAS                                                    |
| A1AG2_HUMAN   | Alpha-1-acid glycoprotein 2                                |
| A1AG1_HUMAN   | Alpha-1-acid glycoprotein 1                                |
| OMGP_HUMAN    | Oligodendrocyte-myelin glycoprotein                        |
| NRX2A_HUMAN   | Neurexin-2                                                 |
| NRCAM_HUMAN   | Neuronal cell adhesion molecule                            |
| NPTXR_HUMAN   | Neuronal pentraxin receptor                                |
| NPTX1_HUMAN   | Neuronal pentraxin-1                                       |
| NEGR1_HUMAN   | Neuronal growth regulator 1                                |
| LYSC_HUMAN    | Lysozyme C                                                 |
| LYVE1_HUMAN   | Lymphatic vessel endothelial hyaluronic acid receptor 1    |
| LYNX1_HUMAN   | Ly-6/neurotoxin-like protein 1                             |
| LY6H_HUMAN    | Lymphocyte antigen 6H                                      |
| A2GL_HUMAN    | Leucine-rich alpha-2-glycoprotein                          |
| LAMP2_HUMAN   | Lysosome-associated membrane glycoprotein 2                |
| K2C1_HUMAN    | Keratin, type II cytoskeletal 1                            |
| KLKB1_HUMAN   | Plasma kallikrein                                          |

|              |                                                                      |
|--------------|----------------------------------------------------------------------|
| KLK6_HUMAN   | Kallikrein-6                                                         |
| IGJ_HUMAN    | Immunoglobulin J chain                                               |
| ITIH4_HUMAN  | Inter-alpha-trypsin inhibitor heavy chain H4                         |
| ITIH2_HUMAN  | Inter-alpha-trypsin inhibitor heavy chain H2                         |
| ITIH1_HUMAN  | Inter-alpha-trypsin inhibitor heavy chain H1                         |
| LV319_HUMAN  | Immunoglobulin lambda variable 3-19                                  |
| LV147_HUMAN  | Immunoglobulin lambda variable 1-47                                  |
| IGLL5_HUMAN  | Immunoglobulin lambda-like polypeptide 5                             |
| IGLC3_HUMAN  | Immunoglobulin lambda constant 3                                     |
| KV401_HUMAN  | Immunoglobulin kappa variable 4-1                                    |
| KV320_HUMAN  | Immunoglobulin kappa variable 3-20                                   |
| KV105_HUMAN  | Immunoglobulin kappa variable 1-5                                    |
| IGKC_HUMAN   | Immunoglobulin kappa constant                                        |
| S4R460_HUMAN | Immunoglobulin heavy variable 3/OR16-9 (non-functional)              |
| IGHM_HUMAN   | Immunoglobulin heavy constant mu                                     |
| IGHG3_HUMAN  | Immunoglobulin heavy constant gamma 3                                |
| IGHG1_HUMAN  | Immunoglobulin heavy constant gamma 1                                |
| IGHA2_HUMAN  | Immunoglobulin heavy constant alpha 2                                |
| IGHA1_HUMAN  | Immunoglobulin heavy constant alpha 1                                |
| IBP7_HUMAN   | Insulin-like growth factor-binding protein 7                         |
| IBP6_HUMAN   | Insulin-like growth factor-binding protein 6                         |
| IBP4_HUMAN   | Insulin-like growth factor-binding protein 4                         |
| IBP2_HUMAN   | Insulin-like growth factor-binding protein 2                         |
|              | Basement membrane-specific heparan sulfate proteoglycan core protein |
| PGBM_HUMAN   |                                                                      |
| SAP3_HUMAN   | Ganglioside GM2 activator                                            |
| FIBG_HUMAN   | Fibrinogen gamma chain                                               |
| FIBB_HUMAN   | Fibrinogen beta chain                                                |
| FIBA_HUMAN   | Fibrinogen alpha chain                                               |
| FCGBP_HUMAN  | IgG <sub>Fc</sub> -binding protein                                   |
| FA5_HUMAN    | Coagulation factor V                                                 |
| CATD_HUMAN   | Cathepsin D                                                          |
| CATB_HUMAN   | Cathepsin B                                                          |
| CBPQ_HUMAN   | Carboxypeptidase Q                                                   |
| CBPE_HUMAN   | Carboxypeptidase E                                                   |
| CERU_HUMAN   | Ceruloplasmin                                                        |
| CNTN2_HUMAN  | Contactin-2                                                          |
| CLUS_HUMAN   | Clusterin                                                            |
| CSTN3_HUMAN  | Calsyntenin-3                                                        |
| CSTN1_HUMAN  | Calsyntenin-1                                                        |
| SCG1_HUMAN   | Secretogranin-1                                                      |
| CFAI_HUMAN   | Complement factor I                                                  |
| CFAD_HUMAN   | Complement factor D                                                  |
| CFAB_HUMAN   | Complement factor B                                                  |
| CADH2_HUMAN  | Cadherin-2                                                           |
| CD14_HUMAN   | Monocyte differentiation antigen CD14                                |
| CADM2_HUMAN  | Cell adhesion molecule 2                                             |
| CA2D1_HUMAN  | Voltage-dependent calcium channel subunit alpha-2/delta-1            |
| CO9_HUMAN    | Complement component C9                                              |
| CO7_HUMAN    | Complement component C7                                              |
| CO6_HUMAN    | Complement component C6                                              |

|             |                                                                |
|-------------|----------------------------------------------------------------|
| CO5_HUMAN   | Complement C5                                                  |
| CO4A_HUMAN  | Complement C4-A                                                |
| CO2_HUMAN   | Complement C2                                                  |
| C1R_HUMAN   | Complement C1r subcomponent                                    |
| C1QC_HUMAN  | Complement C1q subcomponent subunit C                          |
| C1QB_HUMAN  | Complement C1q subcomponent subunit B                          |
| B4GA1_HUMAN | Beta-1,4-glucuronyltransferase 1                               |
| B2MG_HUMAN  | Beta-2-microglobulin                                           |
| ZA2G_HUMAN  | Zinc-alpha-2-glycoprotein                                      |
| VAS1_HUMAN  | V-type proton ATPase subunit S1                                |
| A4_HUMAN    | Amyloid-beta A4 protein                                        |
| APOC1_HUMAN | Apolipoprotein C-I                                             |
| APOA4_HUMAN | Apolipoprotein A-IV                                            |
| APOA2_HUMAN | Apolipoprotein A-II                                            |
| APOA1_HUMAN | Apolipoprotein A-I                                             |
| APLP2_HUMAN | Amyloid-like protein 2                                         |
| APLP1_HUMAN | Amyloid-like protein 1                                         |
| AMBP_HUMAN  | Protein AMBP                                                   |
| ADA22_HUMAN | Disintegrin and metalloproteinase domain-containing protein 22 |
| A2MG_HUMAN  | Alpha-2-macroglobulin                                          |

**Supplementary Table 2: Serum autoantibody findings and associated clinical characteristics in 10 patients with COVID-19.**

| <b>Patient</b> | <b>Antibody</b> | <b>Syndrome</b>                                                                                      |
|----------------|-----------------|------------------------------------------------------------------------------------------------------|
| #1             | NMDAR 1:100     | Nystagmus, orofacial myoclonus (first present after resuscitation),<br><br>MRI: hypoxic brain damage |
| #2             | Yo 1:100        | Brachiofacial myoclonia, EEG normal                                                                  |
| #3             | Caspr2 1:32     | Unsteady gait and delir                                                                              |
| #4             | Myelin 1:100    | Protracted waking after mechanical ventilation                                                       |
| #5             | Myelin 1:100    | Hyperactive delir                                                                                    |
| #6             | Myelin 1:100    | Delir                                                                                                |
| #7             | Myelin 1:100    | Delir                                                                                                |
| #8             | Caspr2 1:10 and | Very severe delir                                                                                    |

NMDAR 1:10

|     |             |                                  |
|-----|-------------|----------------------------------|
| #9  | Glycin 1:10 | Mnemonic difficulties (known AD) |
| #10 | Glycin 1:10 | Myalgia, delir                   |

**Supplementary Table 3. Change of the data matrix size after pre-processing steps.**

| Step                                        | N features | M samples |
|---------------------------------------------|------------|-----------|
| Input data matrix size                      | 5486       | 74        |
| After sample removal                        | 5486       | 72        |
| After features with NA>35% removal          | 2230       | 72        |
| After filtering out nonproteotypic peptides | 1992       | 72        |
| After peptides summarization                | 271        | 72        |
| Final protein matrix size                   | 271        | 72        |

**Supplementary Table 4. Clinical groups used for analysis along with some demographic information.** COVID-19 Patients were divided into cohort with elevated Procalcitonin levels (PCT>1) indicating a confounding superinfection (C19\_high\_PCT) and a cohort C19\_low\_PCT with normal Procalcitonin levels (PCT ≤ 1). All C19\_high\_PCT patients had WHO severity grade 4, C19\_low\_PCT patients on average had WHO severity grade 3. Two other groups were control and HSV Meningitis (HSVE).

|              | Female      |         |           | Male        |         |           | Total       |         |           |
|--------------|-------------|---------|-----------|-------------|---------|-----------|-------------|---------|-----------|
|              | Avg Age     | Avg PCT | NN pat    | Avg Age     | Avg PCT | NN pat    | Avg Age     | Avg PCT | NN pat    |
| C19_high_PCT | 63.7        | 1.8     | 3         | 71.8        | 4.0     | 13        | 70.3        | 3.6     | 16        |
| C19_low_PCT  | 69.2        | 0.1     | 5         | 68.8        | 0.3     | 17        | 68.9        | 0.2     | 22        |
| control      | 57.6        |         | 17        | 58.8        |         | 11        | 58.1        |         | 28        |
| HSVE         | 53.2        |         | 6         |             |         |           | 53.2        |         | 6         |
| <b>Total</b> | <b>59.2</b> |         | <b>31</b> | <b>67.0</b> |         | <b>41</b> | <b>63.7</b> |         | <b>72</b> |

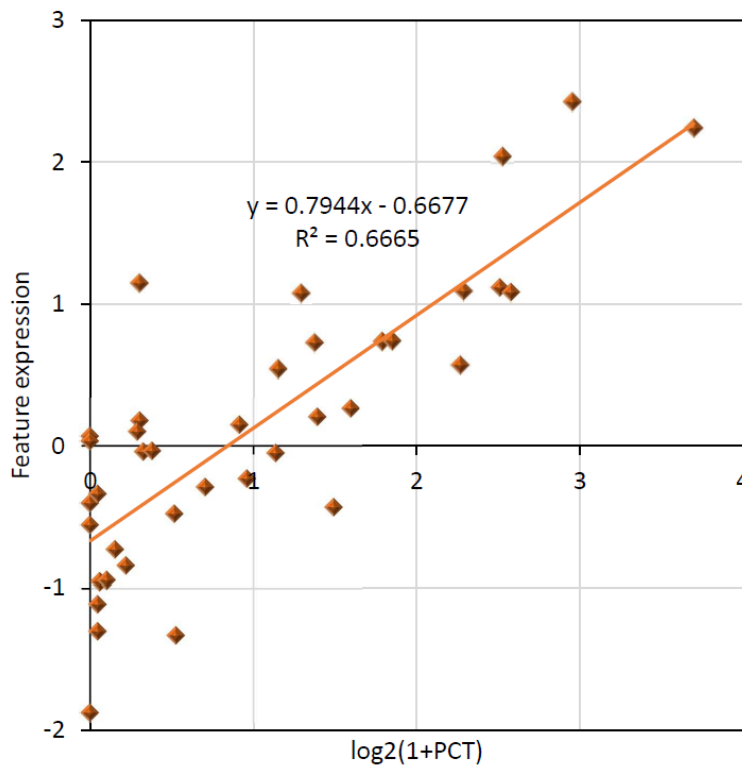

**Supplementary Figure 1. Linear dependence of combined log<sub>2</sub> expression of three proteins**  $y = (C4A + CD14)/2 - NRCAM$  on transformed PCT level  $x = \log_2(1 + PCT)$ . Proteins C4A and CD14 show increase of expression with increase of  $x$  and have nearly opposite dependence on sex and WHO grade, while NRCAM show decrease with increase of  $x$  and is almost independent on sex and WHO grade. Linear fit showed that approximately 67% of the variation in combined proteins expression can be explained by BSI ( $R^2 = 0.67$ ). The fit was conducted on all COVID samples (as shown in the Figure) and on WHO grade 4 only samples with practically the same outcome.

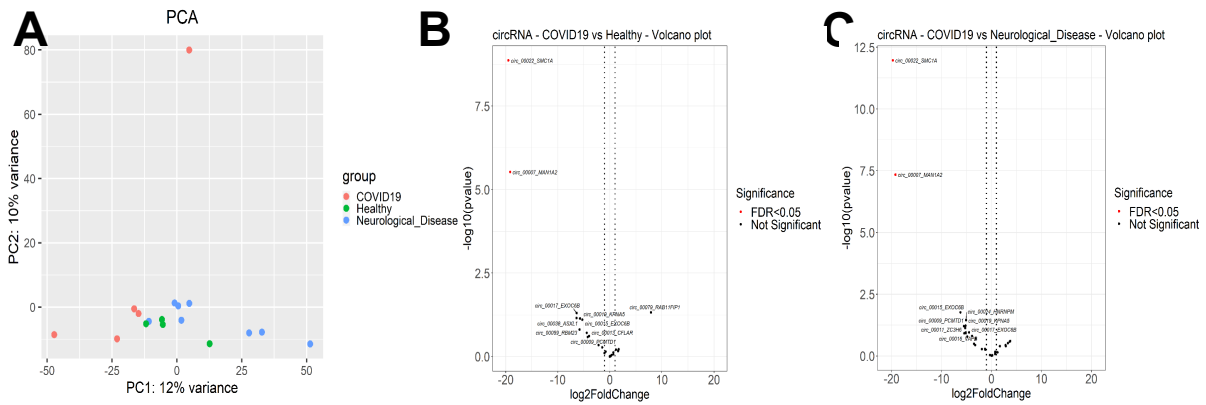

Supplementary Figure 2. CircRNA data analysis. (A) Principal component analysis (PCA) of circRNA profile in CSF of Covid-19 patients, healthy controls and patients with neurological disease. Differential expression analysis of circRNAs in (B) CSF of Covid-19 patients and healthy controls and (C) CSF of Covid-19 patients and patients with neurological disease. Red dots: FDR < 0.05.

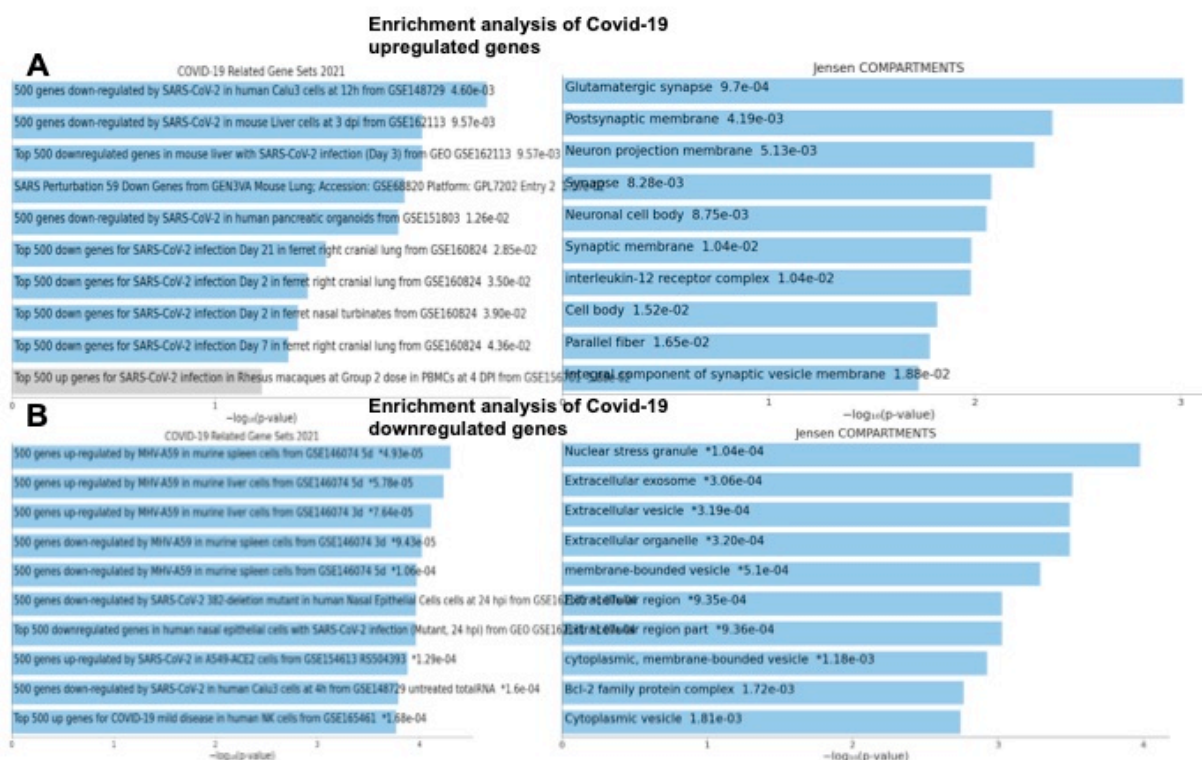

Supplementary Figure 3 Supplementary Figure. Enrichment analysis of deregulated genes in COVID-19 CSF. Top 10 enriched items in the COVID-19 related gene sets 2021 and cellular compartment localization in the analysis of (A) COVID-19 up-regulated genes and (B) COVID-19 down-regulated genes. The p-value is listed after each item; the items with p-value < 0.05 are significantly enriched; An asterisk (\*) next to a p-value indicates the term also has a adjusted p-value <0.05.
